# Supplementary material for: Characterization of Mycoviruses in Armillaria ostoyae and A. cepistipes in the Czech Republic
Source: MDPI journal article supplement (doi:10.3390/v16040610), 2024-04-15
Supplement: s1 [file s1]

**Figure S1.** Amino acid alignment showing conserved motifs. **A**, Amino acid alignment of ambi-like viruses described in this study and related members. QPB44666 – *Tulesnella ambivirus* 2, QPB44664 – *Tulesnella ambivirus* 1, QMP84026 – *Rhizoctonia solani ambivirus* 2, QMP84024 – *Rhizoctonia solani ambivirus* 1, QUD20363 – *Armillaria borealis* ambi-like virus 2, AoALV3 – *Armillaria ostoyae* ambi-like virus 3\*, DAD54839 – *Armillaria mellea* ambi-like virus 2, AoALV4 – *Armillaria ostoyae* ambi-like virus 4\*, AoALV1 – *Armillaria* ambi-like virus 1\*, QUD20376 – *Armillaria* ambi-like virus 3, QMP84022 – *Cryphonectria parasitica ambivirus* 1, AoALV2 – *Armillaria ostoyae* ambi-like virus 2\*, DAD54837 – *Armillaria mellea* ambi-like virus 1, QPB44674 – *Tulesnella ambivirus* 5, DAD54841 – *Armillaria novae-zelandiae* ambi-like virus 1, DAD54835 – *Armillaria luteobubalina* ambi-like virus 1, QUD20357 – *Armillaria borealis* ambi-like virus 1, DAD54833 – *Armillaria ectypa* ambi-like virus 1, QPB44670 – *Tulesnella ambivirus* 3, QPB44672 – *Tulesnella ambivirus* 4, QPB44668 – *Ceratobasidium ambivirus* 1

**B**, Amino acid alignment of *Armillaria* tymovirus described in this study and related members. AoTV – *Armillaria* spp. tymovirus\*, QOX06053.1 – *Lentinula edodes* tymo-like virus 1, YP\_001718499.1 – *Lolium* latent virus, QJD13457.1 – Alfalfa virus S, NP\_932306.1 – *Botrytis* virus X, BAD35017.1 – *Bombyx mori* latent virus, YP\_009551972.1 – Alfalfa virus F.

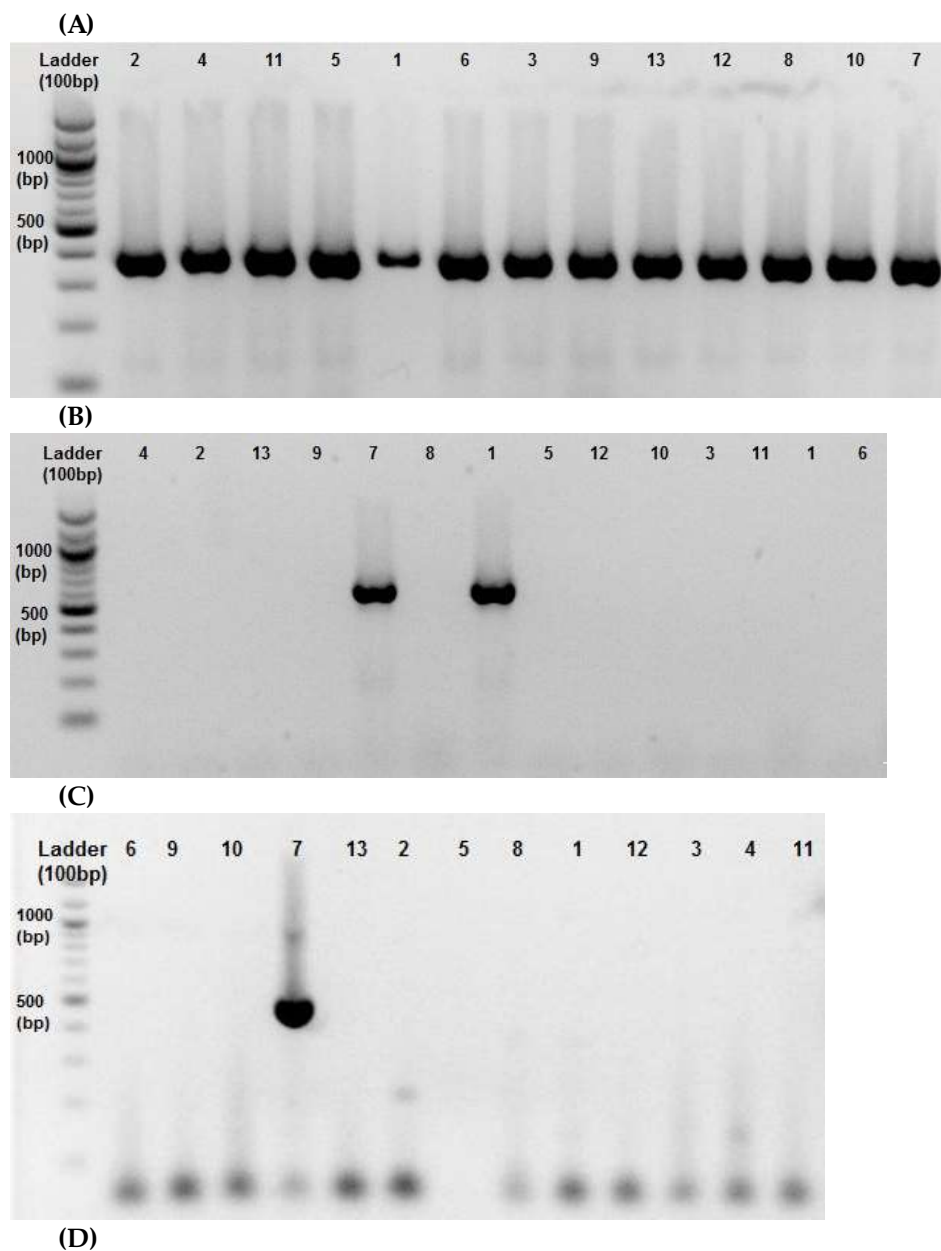

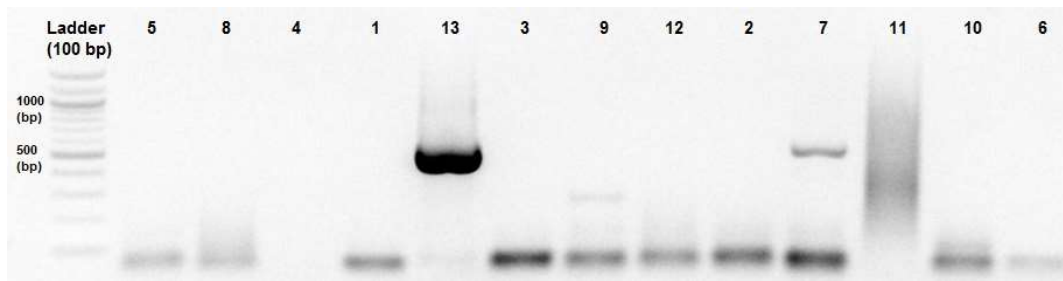

(E)

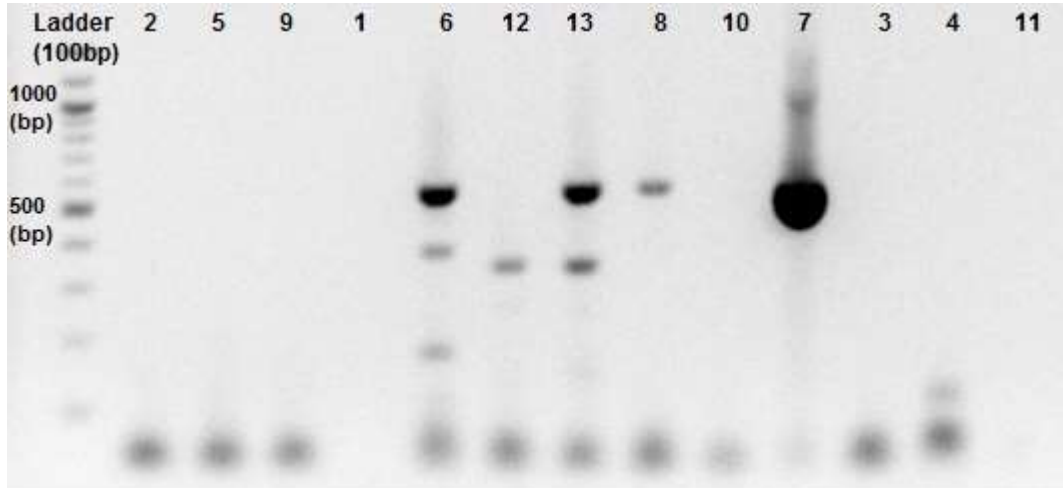

(F)

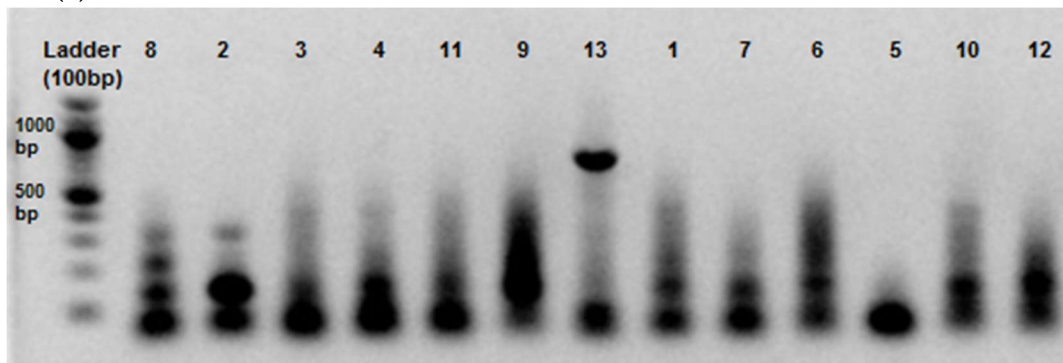

**Figure S2.** Resulting RT-PCR gels. **A**, Positive control with EF primers **B**, AALV1 **C**, AoALV2 **D**, AoALV3 **E**, AoALV4 **F**, AoTV1; 100bp DNA Ladder (Thermo Fisher Scientific) was used in all analyses.

**Table S1.** List of primers used for direct virus RT-PCR detection

| Virus                                | Direction | Sequences (5'-3')         | Tm (°C) | Product size (nt) |
|--------------------------------------|-----------|---------------------------|---------|-------------------|
| Armillaria ambi-like virus 1         | Forward   | CCCCTCATGGTCACTATGGATATG  | 61      | 800               |
|                                      | Reverse   | CTCGCTGAGCCTCTCTACATCTT   |         |                   |
| Armillaria ostoyae ambi-like virus 2 | Forward   | CGAGATGTTAGCCCTATAACCCATC | 60      | 487               |
|                                      | Reverse   | GGTGTAGGAACTGTCTGTACTCTG  |         |                   |
| Armillaria ostoyae ambi-like virus 3 | Forward   | CCGACTATAGGATTGTCCCTTCAG  | 60      | 477               |
|                                      | Reverse   | CATCTGTCTTATCAGCTCTCTGGG  |         |                   |
| Armillaria ostoyae ambi-like virus 4 | Forward   | CTATCCCTTCCGACTTCTTTCCC   | 61      | 588               |
|                                      | Reverse   | CTCTATCGAGACCAGATCCCAGATC |         |                   |
| Armillaria ostoyae tymovirus 1       | Forward   | GAGCTCTAGGTGAAGTGGAGTATG  | 60      | 731               |
|                                      | Reverse   | CTCTCTTATAGGAACTCTAGGCGC  |         |                   |

**Table S2. A,** Pairwise Sequence Comparison (PASC) percentages (%) based on nucleotide sequence of ambi-like viruses hosted by *Armillaria cepistipes* and *ostoyae*. **B,** PASC % based on RdRP amino acid (aa) sequence of ambi-like viruses hosted by *Armillaria cepistipes* and *A. ostoyae*.

| A      |        |        |        | B      |        |        |        |
|--------|--------|--------|--------|--------|--------|--------|--------|
|        | AoALV1 | AoALV2 | AoALV3 |        | AoALV1 | AoALV2 | AoALV3 |
| AoALV2 | 27.66  |        |        | AoALV2 | 19.53  |        |        |
| AoALV3 | 31.40  | 31.90  |        | AoALV3 | 77.46  | 18.65  |        |
| AoALV4 | 85.73  | 29.82  | 30.09  | AoALV4 | 90.93  | 19.20  | 77.52  |

**Table S3.** Types and genomic position of the ribozymes detected in *Armillaria* ambiviruses.

| Virus Name | Contig Name                        | Ribozyme (+)     | e-Value  | Ribozyme (-)     | e-Value |
|------------|------------------------------------|------------------|----------|------------------|---------|
| AoALV1     | ambi_spadesMETA_NODE_2_length_6862 | HHRz (4510-4564) | 1.4e-07  | HHRz (330-254)   | 4.6e-11 |
| AoALV2     | ambi_spadesMETA_NODE_4_length_6697 | HPRz (4424-4531) | 5,00E-08 | HPRz (4987-4884) | 5.7e-10 |
| AoALV3     | ambi_spadesMETA_NODE_8_length_4562 | HHRz (1727-1803) | 7.7e-09  | HHRz (2068-2014) | 1.1e-08 |
| AoALV4     | ambi_spadesMETA_NODE_9_length_4549 | HHRz (1-41)      | 0.021    | HHRz (333-256)   | 2.5e-09 |

The (+) polarity is defined as the RNA strand coding for the polymerase (ORFA).
